# Supplementary material for: The Human ABCG2 Transporter Relies on a Triple-Gated Translocation Channel for Multidrug Efflux
Source: Research Square preprint supplement (doi:10.21203/rs.3.rs-4288035/v1), 2024-04-29
Supplement: Supplementary file 1 [file 623ea529dea764569e2e5f88.xlsx]

## Sheet: Fig5b
Fig. 5b
ATPase activity (% of WT)
	K86M	WT	R482G		F431A	F431Y	F431W		F432A	F432Y	F432W		F431A + F432A	F431Y + F432Y	F431W + F432W
	40.9	100	110		87	77.8	118	0	95.5	111.2	117.9		92	92.2	72.7
	45.5	100	100		61.4	104.5	100	0	69	100	97.6		66.7	87.1	150
	23.5	100	96.6		61.1	100	104.5	0	127.3	62.1	88.9		69	62.1	100
	4.5	100	72.7		77.3	63.6	77.3	0	105.9	109.1	81.8		64.7	72.7	110.3
	51.7	100	81.8		88.2	100	70.6	0	118.2	113.6	118.2		90.9	77.3	118.2
	51.7	100	113.6		109.1	127.6	109.1		79.3	100	70.6		104.5	86.4
		100	117.2		104.5	77	79.3		101.1	109.1	122.7		63.2	77
		100	73.6		103.4	98.9	100		101.1	127.3	104.6		80.7	102.3
		100			78.2		117			89.7	83
		100			103.4					90.9
Average	36.3	100	95.6875	0	87.36	93.675	97.3111	0	99.675	101.3	98.3667	0	78.9625	82.1375	110.24
Mitoxantrone efflux (% of WT)
	Mock	WT	R482G		F431A	F431Y	F431W		F432A	F432Y	F432W		F431A + F432A	F431Y + F432Y	F431W + F432W
	-3.67	106.54	105.08		55.98	106.75	115.03		0.45	83.18	64.45		30.44	57.52	79.42
	2.24	109.87	100.05		88.29	116.18	115.98		29.65	105.45	73.35		-6.71	83.88	81.24
	5.62	97.85	103.41		48.4	113.24	116.18		-1.63	83.36	44.62		-19.21	68.93	74.79
	-61.36	103.64	105.81		80.37	100.19	107.09		33.08	76.94	34.21		5.63	78.37	39.22
	9.02	117.93	97.62		100.06	119.98	96.32		-7.42	61.23	46.97		-3.62	81.5	60.02
	19.68	93.14	87.76		47.59	106.56	104.8		3.48	89.1	78.78		22.59	61.76	92.94
	31.74	95.23	112.22		81.52	84.89	80.69		-0.52	106.24	53.86		-0.46	49.23	76.92
	-27.64	103.62	112.95		40.01	84.37	95.71		-0.22	63.54	44.01		16.66	72.69	86.04
	-24.44	72.49	106.56		69.28	98.28	80.8		28.11	73.31	73.69		23.17	84.07	81.83
	14.91	104.93	102.72		74.02	83.26	109.41		14.66	76.44	53.1		-16.22	65.21	74.61
	-14.75	68.82	110.65		53.24	109.35	111.3		32.27	76.07				62.22
	11.24	102.75	105.05		55.57	114.36	96.9		16.9	109.75				83.5
	3.2	96.3			74.41	101.27	107.7			88.96				59.92
	0.27	100.2			65.57	96.9	102.11			96.26
	18.56	97.72				107.2	102.73			100.84
	15.41	111.33				102.55				87.23
		118.29
		86.36
		101.6
		107.72
		103.68
Average	0.001875	100	104.157		66.7364	102.833	102.85		12.4008	86.1187	56.704		5.227	69.9077	74.703
Pheophorbide A efflux (% of WT)
	Mock	WT	R482G		F431A	F431Y	F431W		F432A	F432Y	F432W		F431A + F432A	F431Y + F432Y	F431W + F432W
	-0.67	96.83	97.24		83.39	99.54	96.29		84.02	96.62	81.06		49.41	95.22	84.8
	-5.75	99.69	100.05		81.45	103.93	93.48		86.84	96.11	88.83		61.24	89.45	89.51
	3.62	94.15	90.96		74.41	93.25	93.94		75.63	85.19	77.05		37.56	76.73	77.17
	-1.76	93.45	93.83		63.45	85.42	100.61		69.08	82.77	66.17		25.94	75.36	73.79
	-4.53	101.71	103.55		92.23	106.34	92.32		84.79	96.63	81.94		52.59	97.67	82.9
	-3.54	100.28	94.12		81.39	102.06	100.52		69.4	87.66	87.42		58.63	96.7	82.71
	8.69	95.92	91.49		83.2	108.75	100.87		80.32	88.5	95.67		27.56	93.31	91.39
	4.15	85.19	80.34		86.76	109.01	92.51		60.62	105.5	99.24		52.61	100.1	106
	0.49	101.24	97.26		58.15	101.03	106.19		79.48	81.56	71.25		16.47	79.3	98.46
	3.88	104.68	98.52		58.88	105.57	101.14		87.14	95.59	66.77		48.2	88.69	93.48
	-1.83	108.9	103.21		63.69	105.35	90.6		80.18	104.18	98.31		42.24	87.84	100.75
		105.47	100.09		57.66	94.91				94.71	82.47				74.28
		107.84	99.31
		106.41	102.13
		98.23	92.96
Average	0.25	99.9993	96.3373		73.7217	101.263	97.1336		77.9545	92.9183	83.015		42.95	89.1245	87.9367
Daunorubicin efflux (% of R482G)
	Mock	WT	R482G		F431A	F431Y	F431W		F432A	F432Y	F432W		F431A + F432A	F431Y + F432Y	F431W + F432W
	-16.09	46.79	102.46		-15.57	39.3	29.39		-16.46	11.32	5.98		-16.6	9.97	32.18
	12.61	36.54	104.05		-44.55	55.56	22.53		-11.44	4.72	1.49		-19.07	25.51	40.22
	1.33	38.92	97.42		0.85	58.9	41.66		2.57	20.22	4.25		10.89	29.97	30.14
	-33.19	25.73	99.1		-48.03	41.13	41.66		-19.01	-15.57	-9.03		-20.09	5.86	3.27
	35.33	33.14	96.96		18.43	65.73	45.58		28.81	31.21	28.18		15.91	47.21	4.36
Average	-0.002	36.224	99.998		-17.774	52.124	36.164		-3.106	10.38	6.174		-5.792	23.704	22.034

## Sheet: Fig5c
Fig. 5c																					Fig. 5c
Mitoxantrone accumulation (% of Mock) without Ko143																					Mitoxantrone accumulation (% of WT) in the present of Ko143
	Mock	WT	R482G		F431A	F431Y	F431W		F432A	F432Y	F432W		F431A + F432A	F431Y + F432Y	F431W + F432W							Mock	WT	R482G		F431A	F431Y	F431W		F432A	F432Y	F432W		F431A + F432A	F431Y + F432Y	F431W + F432W
	105.89	22.12	23.22		60.29	21.96	15.7		102.21	39.75	53.89		79.57	59.13	42.59							111.69	82.31	93.95		80.1	64.37	107.06		93.17	71.77	75.7		79	122.08	76.68
	101.4	19.61	27.01		35.9	14.84	14.99		80.17	22.94	47.18		107.62	39.23	41.22							113.93	121.73	103.51		120.4	115.91	116.13		130.36	127.74	126.99		116.43	72.42	75.58
	98.84	28.67	24.48		66.01	17.06	14.83		103.79	39.62	68.87		78.61	50.51	46.09							98.89	99.55	118.16		77.92	83.29	100.88		82.29	73.76	81.18		77.22	87.25	73.98
	96.26	24.31	22.66		41.87	26.91	21.7		77.57	23.55	44.46		117.06	35.55	72.95							100.24	103.32	105.3		118.39	108.52	112.03		103.5	124.77	123.69		110.71	101.44	86.9
	88.17	13.52	28.85		41.01	27.01	29.83		108.15	56.33	76.73		98.3	43.38	57.24							79.44	125.19	122.33		120.03	111.17	116.28		88.45	70.34	132.4		107.8	69.88	110.65
	79.01	32.23	36.29		50.25	22.1	23.43		99.93	35.28	67.09		105.28	41.02	32.39							126.94	99.99	122.36		95.22	79.66	119.44		99.96	101.1	106.68		93.88	122.51	103.63
	124.08	30.65	17.83		46.67	38.46	41.63		102.95	22.34	43.08		85.49	55.93	74.14							124.88	90.28			111.04	66.7	109.18		109.68	118.89	114.86		121.44	81.5	97.62
	121.65	24.32	17.28		62.36	38.86	30.29		102.72	54.58	61.89		102.9	65.38	44.48							87.97	108.58			95.3	108.93			97.53	93.2	122.31		112.54	120.31	111.33
	91.79	23.33	22.1		60.6	28.36	41.55		71.06	47.21	69.32		89.98	47.67	27.43							112.55	98.05			113.24	80.54			124.06	118.62			122.37	105.92	114.72
	114.3	24.98	25		46.38	19.99	19.95		81.33	44.84	46.92		85.06	39.08	37.6								120.03				137.12
	94.57	29.85	19.01		53.05	16.21	18.53		91.48	45.12	62.47		114.8	53.32	40.77								109.5				106.53
	100.67	26.91	23.24			26.1	29.4		78.19	35.39				55.58	29.89						Average	106.281	105.321	110.935		103.516	96.6127	111.571		103.222	100.021	110.476		104.599	98.1456	94.5656
	102.9	28.78				29.39	21.24		89.79	29.87				39.51	46.22
	89.02	18.5				21.62	25.46			26.42				57.31
	91.41	13.25				25.13	25			36.7
		37.35
		25.85
		21.23
		24.28
		47.83
		50.59
Average	99.9973	27.0552	23.9142		51.3082	24.9333	24.902		91.4877	37.3293	58.3545		96.7882	48.7571	45.6162
Pheophorbide A accumulation (% of Mock) without Ko143																					Pheophorbide A accumulation (% of WT) in the present of Ko143
	Mock	WT	R482G		F431A	F431Y	F431W		F432A	F432Y	F432W		F431A + F432A	F431Y + F432Y	F431W + F432W							Mock	WT	R482G		F431A	F431Y	F431W		F432A	F432Y	F432W		F431A + F432A	F431Y + F432Y	F431W + F432W
	100.57	18.57	18.23		29.88	16.29	19.02		29.34	18.74	31.83		58.45	19.92	28.69							99.69	62.9	63.66		54.21	57.89	64.55		36.14	39.44	64.22		64.03	47.05	63.9
	104.83	16.17	15.86		31.51	12.6	21.39		26.97	19.18	25.3		48.5	24.77	24.72							76.12	45.22	46.95		45.65	32.61	48.96		24.63	30.5	47.04		47.94	34.14	46.58
	85	20.82	23.5		37.43	21.58	21		36.4	28.36	35.21		68.41	35.47	35.1							102.36	57.56	80.15		53.72	57.79	65.09		39.62	45.89	78.53		70.98	45.55	78.2
	96.95	21.41	21.09		46.64	28.16	15.39		41.91	30.39	44.35		78.19	36.63	37.94							91.39	49.12	52.52		46.97	44.97	61.07		28.63	32.47	67.07		60.98	38.44	75.43
	113.94	14.46	12.92		22.44	10.57	22.37		28.69	18.74	31.09		55.78	17.86	30.28							94.82	53.5	78.9		31.3	34.58	71.41		25.43	30.79	50.67		40.49	50.28	44.39
	86.85	15.66	20.85		31.55	14.17	15.47		41.64	26.28	26.48		50.69	18.68	30.44							117.27	78.94	74.87		71.89	72.85	94.36		48.96	61.23	76.12		66.74	71.29	74.21
	96.51	19.34	23.06		30.03	8.54	15.17		32.46	25.58	19.55		76.82	21.53	23.15							105.21	79.69	82.87		77.04	75.02	69.15		41.51	85.57	76.35		74.92	76.84	51.61
	99.58	28.36	18.21		27.03	8.33	22.2		49.02	11.28	16.55		55.76	15.82	10.86							107.09	59.56	88.96		67.89	85.08	72.84		42.68	80.54	76.74		55.1	76.92
	96.74	14.86	17.15		51.1	15.04	10.7		33.16	31.41	40.08		86.15	33.31	17.2							101.37	66.02	76.4		77.14	70.63			45.6	76.58	81.29		59.19
	109.84	11.97	13.2		50.49	11.22	14.94		26.72	19.61	43.85		59.47	25.41	21.39							116.67		77.88						48.29
	101.48	8.42	15.83		46.44	11.41	23.81		32.57	12.39	17.33		64.48	26.13	15.27							87.51
	103.81	11.31	16.48		51.51	20.19				20.35	30.65				37.53						Average	99.9545	61.39	72.316		58.4233	59.0467	68.4288		38.149	53.6678	68.67		60.0411	55.0638	62.0457
	83	9.31	14.11
	124	10.52	21.83
		17.39
Average	100.221	15.9047	18.0229		38.0042	14.8417	18.3145		34.4436	21.8592	30.1892		63.8818	25.0482	26.0475
Daunorubicin accumulation (% of Mock) without Ko143																					Daunorubicin accumulation (% of WT) in the present of Ko143
	Mock	WT	R482G		F431A	F431Y	F431W		F432A	F432Y	F432W		F431A + F432A	F431Y + F432Y	F431W + F432W							Mock	WT	R482G		F431A	F431Y	F431W		F432A	F432Y	F432W		F431A + F432A	F431Y + F432Y	F431W + F432W
	112.77	62.87	18.68		112.36	68.81	76.67		113.06	91.02	95.25		113.17	92.08	74.46							90.91	79.29	100.58		90.7	83.79	94.57		79.53	79.13	90.94		85.89	85.04	77.24
	89.99	71	17.42		135.36	55.91	82.12		109.08	96.25	98.82		115.14	79.75	68.08							102.17	143.9	123.24		111.73	108.8	121.06		102.97	105.84	107.5		90.09	83.36	76.35
	98.94	69.11	22.68		99.32	53.25	66.94		97.96	83.95	96.63		91.36	76.22	76.08							96.02	86.55	104.64		120.23	86.53	102.56		103.95	89.34	111.97		99.23	102.41	86.34
	126.34	79.58	21.35		138.11	67.36	66.94		115.08	112.36	107.17		115.95	95.35	97.4							145.66	117.43	135.34		151.08	137.34	142.24		129.04	144.46	137.98		132.29	113.03	108.72
	71.96	73.7	23.05		85.37	47.84	63.82		77.14	75.23	77.64		87.37	62.53	96.54						Average	108.69	106.793	115.95		118.435	104.115	115.108		103.873	104.692	112.097		101.875	95.96	87.1625
Average	100	71.252	20.636		114.104	58.634	71.298		102.464	91.762	95.102		104.598	81.186	82.512

## Sheet: Fig6b
Fig. 6b
ATPase activity (% of WT)
	K86M	WT	R482G		T435A	T435G	T435L	T435S	T435D		N436A	N436L	N436F	N436Q	N436K		T435G + N436A	T435A + N436L	T435L + N436F
		100	110		62.2	50.7	85.6	47.9	13.3		49.8	55.6	72.2	100.1	90.9		44.4	70.6	64.9
	40.9	100	100		66.7	44.4		66.7	24.6		72.7	59.1	100	72.2	94.1		36.4	33.3	108.9
	45.5	100	96.6		76.5	59.1	90.9	72.7	21.7		73.3	55.6	108.9	100	46.7		88.2	36.4	68.4
	23.5	100	72.7		44.4	57.8	44.4	44.4	35.3		57.9	45.6	84.2	57.8	52.6		67.1	29.4	68.4
	2.2	100	81.8		38.6	46.1	47.8	45.6	34.6		65.8	33.9	89.6	54.4	52.6		38.3	84.4	73.5
	42.1	100	64.7		27	62.6	64.7	47	25.4		77.4	61.8	89.7	69.6	61.7		50	93.4	104.7
	38.2	100	113.6		66.4	54.1	41.1	64.5	20.1		67.6	43	68	88.2	59.8			49	90.2
	14	100	73.6		39.3			41.8			75.7		60.4	56.1	44.9			44.9	75.7
	27	100	67.3					42							41			31.4
	15.4	100	72.1
		100
		100
Average	27.6444	100	85.24		52.6375	53.5429	62.4167	52.5111	25		67.525	0.506571	84.125	74.8	60.4778		54.0667	52.5333	81.8375
Mitoxantrone efflux (% of WT)
	Mock	WT	R482G		T435A	T435G	T435L	T435S	T435D		N436A	N436L	N436F	N436Q	N436K		T435G + N436A	T435G + N436L	T435L + N436F
	-13.15	83.84	75.19		21.43	11.22	72.38	74.68	-1.31		11.44	8.93	53.33	57.29	8.17		-16.24	-16.1	-19.88
	16.99	123.81	124.69		21.88	6.07	79.39	87.01	36.22		14.25	35.08	51.05	73.8	28.57		16.55	14.91	19.45
	-9.54	83.97	106.65		-4.7	3.18	80.7	81.7	-24.56		-4.44	13.77	31.48	72.44	32.85		-16.9	9.52	-7.05
	-11.52	112.85	105.6		-27.99	23.7	43.25	35.92	-29.36		22.22	40.45	42.21	60	30.46		9.08		10.04
	17.2	95.53					78.63	78.12	3.14
Average	-0.004	100	103.032		2.655	11.0425	70.87	71.486	-3.174		10.8675	24.5575	44.5175	65.8825	25.0125		-1.8775	2.77667	0.64
Pheophorbide A efflux (% of WT)
	Mock	WT	R482G		T435A	T435G	T435L	T435S	T435D		N436A	N436L	N436F	N436Q	N436K		T435G + N436A	T435G + N436L	T435L + N436F
	-16.06	93.77	67.14		94.16	68.89	103.48	98.29	-30.25		76.79	47.71	88.36	88.48	64.33		-20.24	12.08	58.94
	5.2	109.93	95.8		84.24	65.96	86.57	92.35	-4.97		70.97	52.14	72.24	77.11	68.01		-12.39	27.83	64.42
	6.46	98.77	86.25		81.14	49.01	96.52	99.52	7.09		78.47	30.81	83.89	85.6	76.95		6.6	19.85	56.11
	4.41	104.06	90.32		61.07	57.13	95.98	84.76	-40.63		33.72	29.82	54.44	87.27	67.64		6.34	-0.43	69.81
	0	93.48			61.83		111.11	105.32					79.26	79.51				-11.56	37.58
Average	0.002	100.002	84.8775		76.488	60.2475	98.732	96.048	-17.19		64.9875	40.12	75.638	83.594	69.2325		-4.9225	9.554	57.372
Daunorubicin efflux (% of R482G)
	Mock	WT	R482G		T435A	T435G	T435L	T435S	T435D		N436A	N436L	N436F	N436Q	N436K		T435G + N436A	T435G + N436L	T435L + N436F
	-21.64	36.07	103.84		-11.68	-19.52	-0.43	5.82	1.4		-20.18	-18.52	-17.27	-5.06	-12.23		-26.38	-13.57	-26.94
	0.25	36.06	89.42		31.99	42.94	23.74	27.6	26.62		33.02	47.78	28.79	19.69	48.82		42	59.62	38.4
	21.4	59.54	106.75		35.55	25.79	43.53	29.98	32.91		10.06	21.05	29.57	29.63	33.81		27.56	14.69	38.91
Average	0.00333333	43.89	100.003		18.62	16.4033	22.28	21.1333	20.31		7.63333	16.77	13.6967	14.7533	23.4667		14.3933	20.2467	16.79

## Sheet: Fig6c
Fig. 6c																									Fig. 6c
Mitoxantrone accumulation (% of Mock) without Ko143																									Mitoxantrone accumulation (% of WT) in the present of Ko143
	Mock	WT	R482G		T435A	T435G	T435L	T435S	T435D		N436A	N436L	N436F	N436Q	N436K		T435G + N436A	T435G + N436L	T435L + N436F							Mock	WT	R482G		T435A	T435G	T435L	T435S	T435D		N436A	N436L	N436F	N436Q	N436K		T435G + N436A	T435G + N436L	T435L + N436F
	107.76	50.48	55.6		87.35	93.37	57.25	55.89	100.77		93.24	94.72	68.5	66.16	95.18		109.59	109.51	111.74							135.37	138.15	137.98		136.97	105.73	109.75	108.62	118.29		113.73	127.38	83.11	109.11	113.19		147.61	118.85	120.12
	89.96	26.88	26.36		87.08	96.42	53.12	48.61	78.61		91.58	79.28	69.85	56.42	83.13		90.23	91.19	88.51							87.46	78.12	89.49		124.19	102.65	87.71	96.29	92.51		94.86	82.78	70.93	78.32	88.42		94.06	92.44	82.03
	105.63	50.41	37.02		102.78	98.12	52.34	51.75	114.51		102.62	91.87	81.41	57.22	80.6		109.98	94.38	104.16							126.09	136.52	118.59		139.05	116.74	125.64	109.87	119.36		120.66	111.06	97.81	111.91	97.92		143.48	130.93	109.83
	106.8	33.35	37.64		116.53	86.01	74.46	78.79	117.34		86.88	76.11	75.07	64.56	82.01		94.64		94.07							124.06	116.65	137.34		150.39	121.49	145.06	159.1	143.28		106.29	150.33	115.74	115.2	142.62		143.09	138.87	113.2
	89.84	43.58					53.57	53.86	98.14																	100.32	123.73	111.31				107.7	101.95	125.13			99.83	93.14	110.44	117.02		117.87	115.06	131.8
Average	99.998	40.94	39.155		98.435	93.48	58.148	57.78	101.874		93.58	85.495	73.7075	61.09	85.23		101.11	98.36	99.62						Average	114.66	118.634	118.942		137.65	111.653	115.172	115.166	119.714		108.885	114.276	92.146	104.996	111.834		129.222	119.23	111.396
Pheophorbide A accumulation (% of Mock) without Ko143																									Pheophorbide A accumulation (% of WT) in the present of Ko143
	Mock	WT	R482G		T435A	T435G	T435L	T435S	T435D		N436A	N436L	N436F	N436Q	N436K		T435G + N436A	T435G + N436L	T435L + N436F							Mock	WT	R482G		T435A	T435G	T435L	T435S	T435D		N436A	N436L	N436F	N436Q	N436K		T435G + N436A	T435G + N436L	T435L + N436F
	112.51	26.94	47.69		26.64	46.33	19.37	23.42	123.57		40.17	62.83	31.16	31.07	49.88		115.77	90.59	54.08							121.13	101.33	148.71		117.39	78.48	82.18	92.23	103.09		33.2	68.34	31.67	72.3	51.22		111.69	73.53	52.34
	95.95	14.35	25.36		34.37	48.61	32.55	28.05	103.87		44.7	59.38	43.72	39.92	47.01		109.66	78.32	49.81							86.03	142.23	115.07		115.09	88.03	136.86	95.95	109.34		57.5	59.03	43.7	43.14	41.87		149.45	103.13	54.55
	94.97	23.05	32.8		36.78	61.81	24.8	22.46	94.48		38.86	75.99	34.64	33.31	40.05		94.86	84.54	56.28							85.88	75.82	115.34		174.68	187.93	129.14	139.45	117.2		72.89	104.34	49.64	76.52	61.51		114.2	81.84	43.05
	96.57	18.92	29.63		52.42	55.49	25.22	33.97	131.65		73.73	76.77	57.59	32	47.3		95.06	100.33	45.61							69.22	91.59	95.57		147.91	65.29	71.31	83.34	96.42		42.6	42.51	34.41	64.53	44.53		78.4	67.81	37.38
	100	27.16			51.83		13.44	17.94					38.25	38.06				109.01	70.72						Average	90.565	102.743	118.672		138.768	104.933	104.873	102.743	106.513		51.5475	68.555	39.855	64.1225	49.7825		113.435	81.5775	46.83
Average	100	22.084	33.87		40.408	53.06	23.076	25.168	113.393		49.365	68.7425	41.072	34.872	46.06		103.838	92.558	55.3
Daunorubicin accumulation (% of Mock) without Ko143																									Daunorubicin accumulation (% of WT) in the present of Ko143
	Mock	WT	R482G		T435A	T435G	T435L	T435S	T435D		N436A	N436L	N436F	N436Q	N436K		T435G + N436A	T435G + N436L	T435L + N436F							Mock	WT	R482G		T435A	T435G	T435L	T435S	T435D		N436A	N436L	N436F	N436Q	N436K		T435G + N436A	T435G + N436L	T435L + N436F
	117.03	71.62	18.31		109.19	115.36	100.34	95.42	98.9		115.88	114.57	113.59	103.98	109.62		120.75	110.67	121.2							133.57	88.19	98.93		98.12	105.89	98.1	98.52	95.02		133.83	111.67	118.07	111.37	114.98		107.64	112.65	118.92
	99.81	71.63	29.65		74.83	66.22	81.33	78.29	79.06		74.02	62.41	77.35	84.51	61.59		66.96	53.1	69.79							106.96	75.28	81.21		87.24	85.05	105.25	88.01	93.73		85.38	76.97	87.98	90.77	82.65		86.67	62.88	92.9
	83.17	53.16	16.02		72.03	79.71	65.76	76.42	74.1		92.08	83.44	76.74	76.69	73.4		78.32	88.45	69.38							102.48	75.74	85.57		101.4	72.91	70.55	80.1	81.95		78.72	80.62	92.86	96.79	86.31		86.01	81.93	91.38
Average	100.003	65.47	21.3267		85.35	87.0967	82.4767	83.3767	84.02		93.9933	86.8067	89.2267	88.3933	81.5367		88.6767	84.0733	86.79						Average	114.337	79.7367	88.57		95.5867	87.95	91.3	88.8767	90.2333		99.31	89.7533	99.6367	99.6433	94.6467		93.44	85.82	101.067

## Sheet: Sup-Fig8g
Supplementary Fig. 8g
Protein expression of F182 variants
		Mock	WT	R482G	F182A	F182Y	F182W
		0.63	100	59.1749	84.09	103.39	65.7
		0.65	100	129.79	45.97	101.96	56.1
		9.52	100	80.85	69.23	102.23	56.88
		10.35	100	62.58	114.84	132.47	133.1
			100
2022-12-21
2022-12-21
2022-12-28
2022-12-28
2022-12-28
2023-01-20

## Sheet: Sup-Fig8j-k-m
Supplementary Fig. 8j, k, m
Supplementary Fig. 8k, m
ATPase activity (% of WT)
	K86M	WT	R482G		F182A	F182Y	F182W
	2.2	100	110		93.3	127.3	118.2
	42.1	100	100		121.1	87.7	94.1
	38.2	100	96.6		69.7	110.4	73.7
	52	100	72.7		104.3	89.2	65.8
	14	100	81.8		96.1	83.2	115.7
	27	100	64.7		77.6	69.7
	15.4	100	113.6			65.1
		100	117.2
			73.6
Average	27.2714	100	92.2444		93.6833	90.3714	93.5
Supplementary Fig. 8j, m														Supplementary Fig. 8i-l
Mitoxantrone efflux (% of WT)														Mitoxantrone accumulation (% of Mock) without Ko143									Mitoxantrone accumulation (% of WT) in the present of Ko143
	Mock	WT	R482G		F182A	F182Y	F182W								No inhibitor									with Ko143
	-13.15	83.84	75.19		98.57	107.88	108.14								Mock	WT	R482G	F182A	F182Y	F182W				Mock	WT	R482G	F182A	F182Y	F182W
	16.99	123.81	124.69		88.15	88.04	84.41								107.76	50.48	55.6	41.79	36.29	36.14				87.46	78.12	89.49	83.16	83.81	78.01
	-9.54	83.97	106.65		100.52	82.14	92.23								89.96	26.88	26.36	47.94	48.01	50.15				126.09	136.52	118.59	109.89	104.64	127.65
	-11.52	112.85	105.6		82.12	79.96	66.71								105.63	50.41	37.02	40.63	51.49	45.53				124.06	116.65	137.34	97.73	88.79	125.23
	17.2	95.53													106.8	33.35	37.64	51.5	52.78	60.6				100.32	123.73	111.31	101.47	129.62	140.64
Average	-0.004	100	103.032		92.34	89.505	87.8725								89.84	43.58
														Average	99.998	40.94	39.155	45.465	47.1425	48.105			Average	109.483	113.755	114.182	98.0625	101.715	117.883
Pheophorbide A efflux (% of WT)														Pheophorbide A accumulation (% of Mock) without Ko143									Pheophorbide A accumulation (% of WT) in the present of Ko143
	Mock	WT	R482G		F182A	F182Y	F182W								Mock	WT	R482G	F182A	F182Y	F182W				Mock	WT	R482G	F182A	F182Y	F182W
	-16.06	93.77	67.14		78.41	86.16	83.5								112.51	26.94	47.69	38.91	32.87	34.95				121.13	101.33	148.71	135.94	127.56	145.89
	5.2	109.93	95.8		90.87	103.4	96.43								95.95	14.35	25.36	29.2	19.44	24.87				86.03	142.23	115.07	76.04	98.18	110.98
	6.46	98.77	86.25		92.94	93.17	89.16								94.97	23.05	32.8	27.59	27.41	30.53				85.88	75.82	115.34	80.06	80.5	93.27
	4.41	104.06	90.32		97.14	100.36	80.19								96.57	18.92	29.63	24.32	21.81	37.52				69.22	91.59	95.57	66.49		89.24
		93.48			86.97	76.49	85.89								100	27.16		32.24	40.41	33.08
Average	0.0025	100.002	84.8775		89.266	91.916	87.034							Average	100	22.084	33.87	30.452	28.388	32.19			Average	90.565	102.743	118.672	89.6325	102.08	109.845
Daunorubicin efflux (% of R482G)														Daunorubicin accumulation (% of Mock) without Ko143									Daunorubicin accumulation (% of WT) in the present of Ko143
	Mock	WT	R482G		F182A	F182Y	F182W								Mock	WT	R482G	F182A	F182Y	F182W				Mock	WT	R482G	F182A	F182Y	F182W
	-21.64	36.07	103.84		9.37	15.44	25.15								117.03	71.62	18.31	92.63	87.85	80.22				133.57	88.19	98.93	94.19	89.83	96.85
	0.25	36.06	89.42		62.1	42.04	55.85								99.81	71.63	29.65	51.14	66.92	56.06				106.96	75.28	81.21	72.62	81.06	72.02
	21.4	59.54	106.75		41.77	38.52	29.72								83.17	53.16	16.02	67.14	69.7	76.62				102.48	75.74	85.57	77.13	73.25	85.97
Average	0.00333333	43.89	100.003		37.7467	32	36.9067							Average	100.003	65.47	21.3267	70.3033	74.8233	70.9667			Average	114.337	79.7367	88.57	81.3133	81.38	84.9467

## Sheet: Sup-Fig10d
Supplementary Fig 10d
Expression of F431-F432 variants
			Mock	WT	R482G	F431A	F431Y	F431W	F432A	F432Y	F432W	F431A + F432A	F431Y + F432Y	F431W + F432W
			6.31	100	52.71	35.85	52	82.39	75.63	43.74	86.75	42.75	38.08	16.24
			1.15	100	86.69	68.17	19.63	100.95	63.41	52.99	106.07	10.91	6.1	9.11
			-0.33	100	63.13	23.48	33.73	95.44	96.07	75.68	55.62	19.25	6.55	5.98
			0.8	100	55.63	41.83	38.66	43.46	69.66	16.6	83.33	13.13	26.61	16.43
			0.68	100		21.68	34.71	60.74	87.06	31.57	62.61	13.89	12.56	22.04
			-0.11	100		21.1	66.35	43.13	93.3	21.04	41.69	25.57	8.89	11.16
			-0.14	100		37.73	51.06	46.58	77.43	30.26	62.63	20.43	15.84	17.81
			0.37	100		28.02	55	77.62	93.71	16.65	78.91	17.35	9.78	12.3
			-0.37	100			66.66	101.08		15.14	85.42	11.47		31.12
			-0.43	100			33.73	61.1		11.42	89.12	12.37		24.95
			-0.12	100			55.41	116.91			63.42	21.78		25.52
			-0.78	100			72.19	83.64			114.86	18.39		15.1
				100				112.02
2021-12-14
2021-09-29
2021-11-11
2021-11-11
2021-11-05
2021-09-17
2021-08-19
2021-08-25
2021-08-28
2021-08-31
2021-09-01
2021-09-03
2021-09-03
2021-09-10
2021-09-22
2021-11-03
2021-11-05

## Sheet: Sup-Fig11d
Supplementary Fig 11d
Expression of T435-N436 variants
			Mock	WT	R482G	T435A	T435G	T435L	T435S	T435D	N436A	N436L	N436F	N436Q	N436K	T435G + N436A	T435A + N436L	T435L + N436F
			-0.55	100	59.1749	85.29	98	23.71	79.94	9.14	74.87	52.39	51.18	48.87	38.69	75.52	70.05	48.93
			-0.21	100	129.79	46.46	49.31	19.18	62.21	-8.62	98.79	49.93	52.73	28.37	49.66	91.12	75.67	69.03
			0.63	100	80.85	27.88	34.24	12.57	31.14	1.8	54.89	78.08	84.45	13.59	46.54	44.7	65.23	34.4
			0.65	100	62.58	52.72	61.31	7.63	62.17	1.92	62.86	75.87	76.07	19.13	40.67	46.91	103.66	47.17
			9.52	100		62.32	66.43	14.71	76.14	2.81	87.9			17.71		87.47		77.2
			10.35	100		92.76		37.69						48.18
2022-12-21
2022-12-21
2022-12-28
2022-12-28
2022-12-28
2023-01-20
